# Supplementary material
Source: PubMed Central journal article supplement (PMC6742567)

Fig. 2e

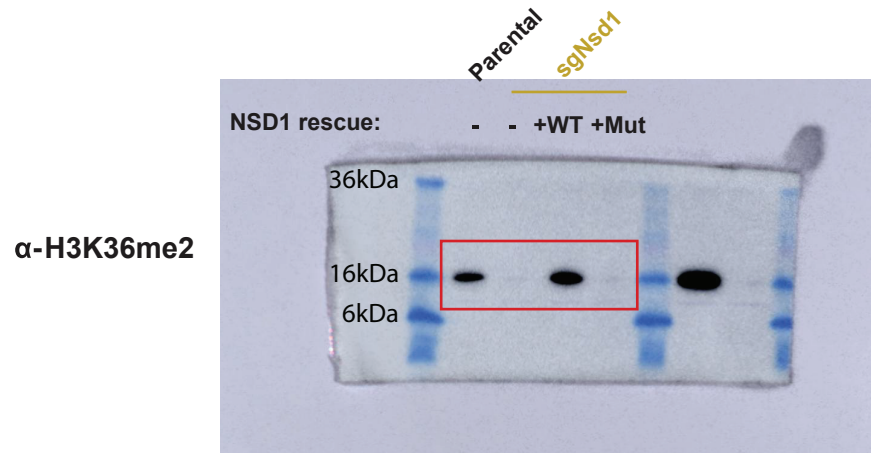

Stripped and re-probed:

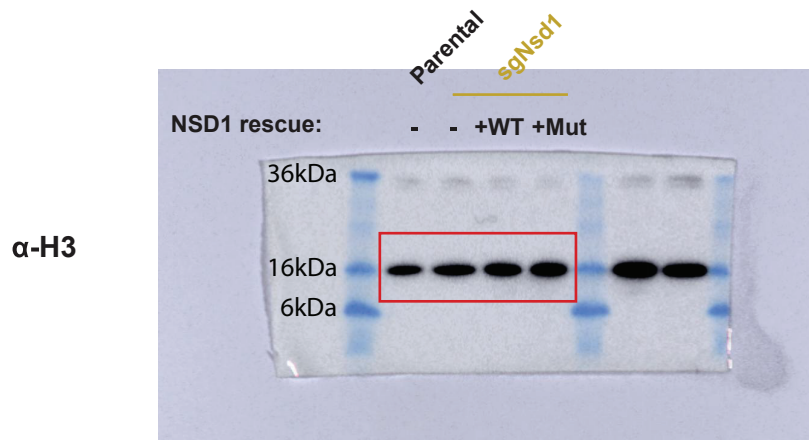

Fig. 4e

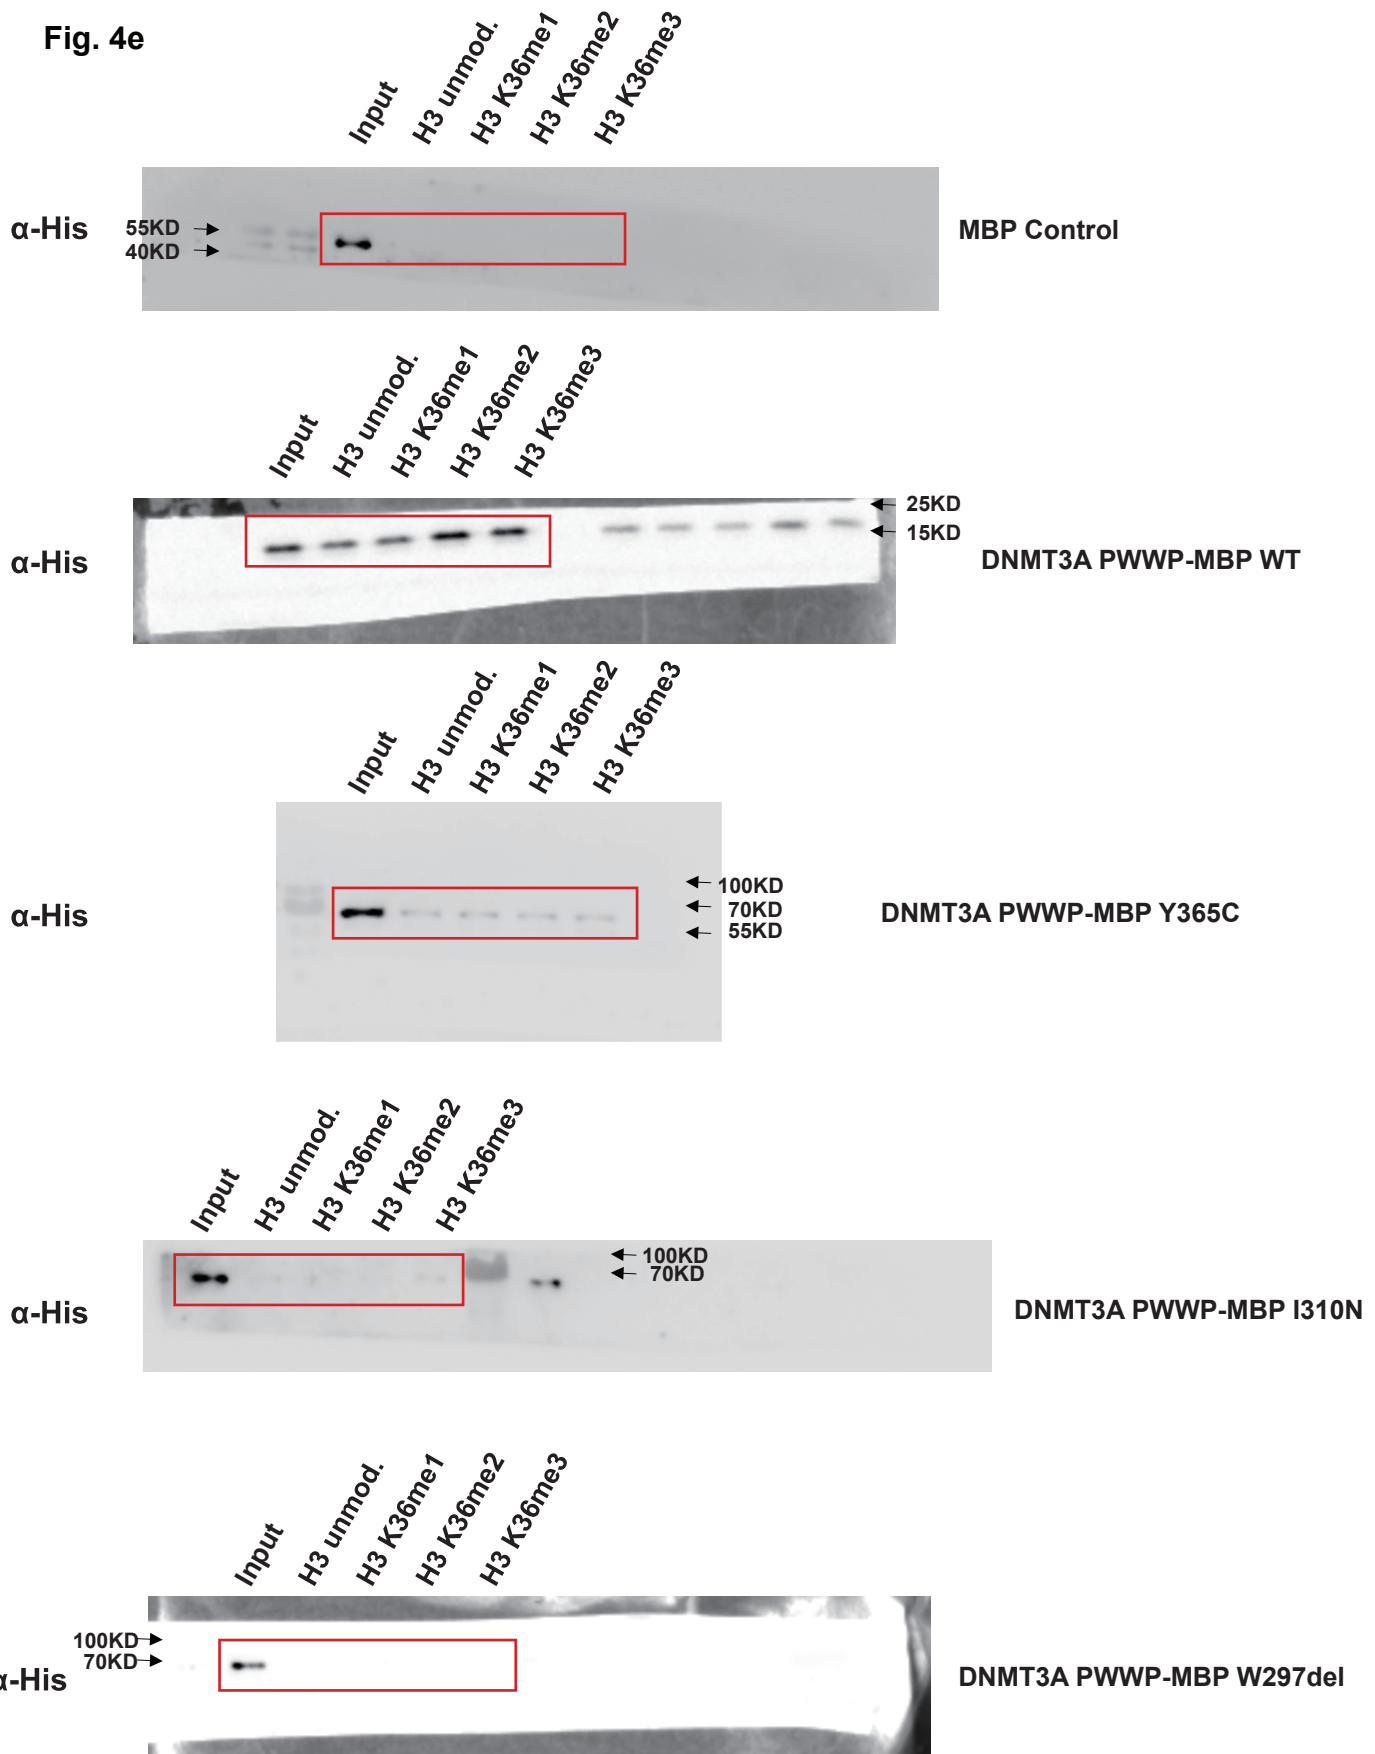

**Extended Data Fig. 3a**

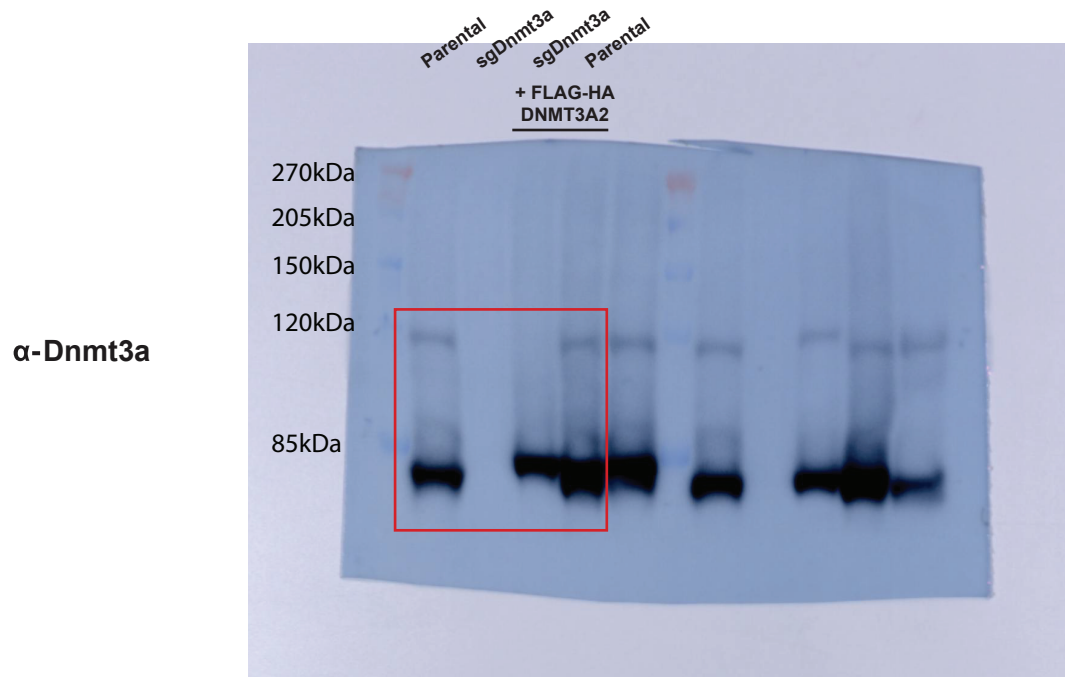

Stripped and re-probed:

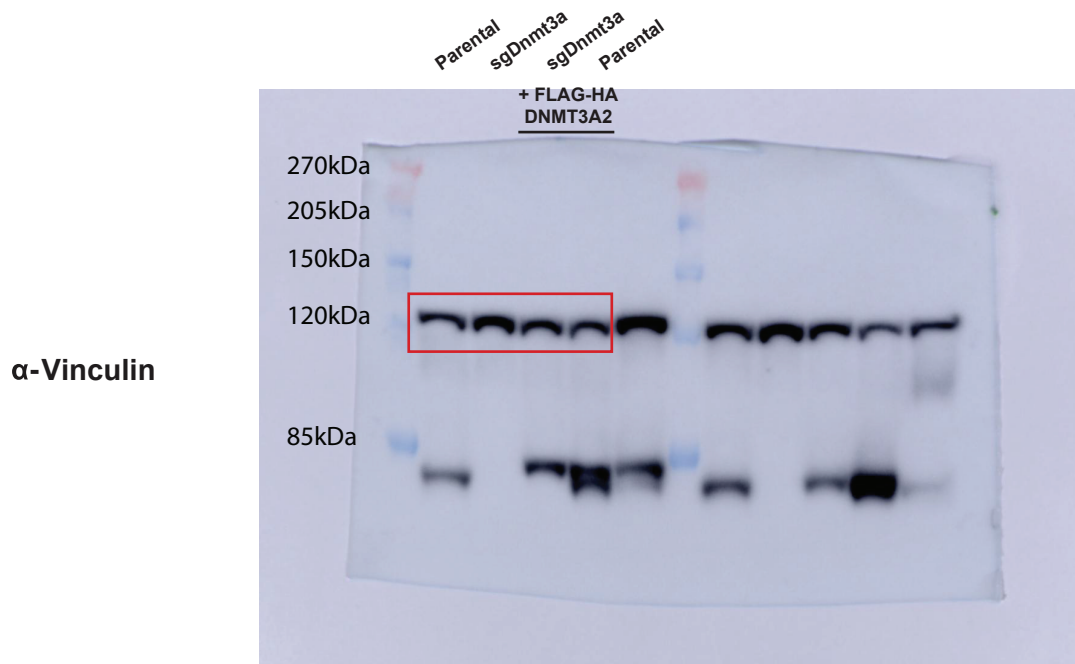

# Extended Data Fig. 4a

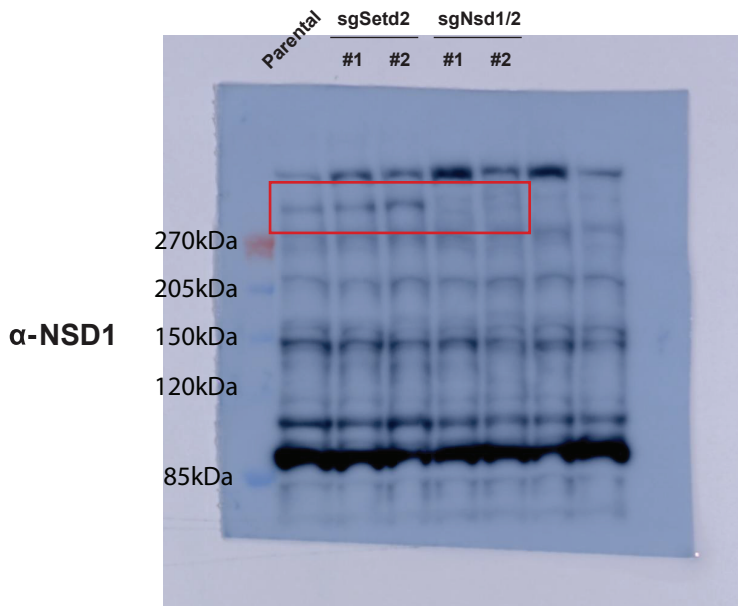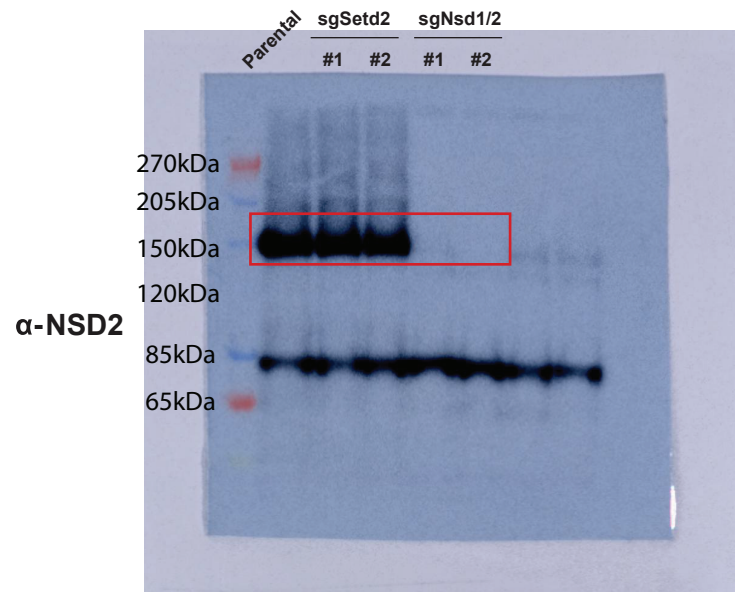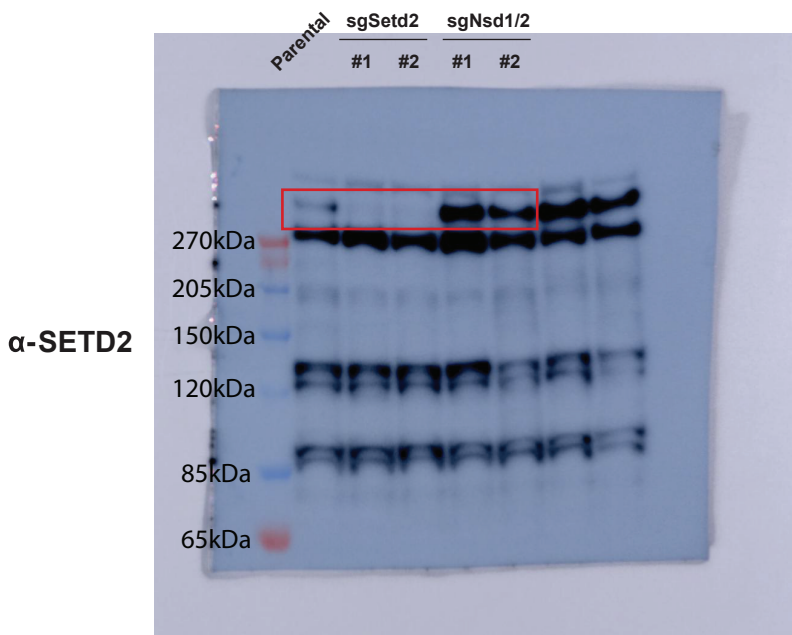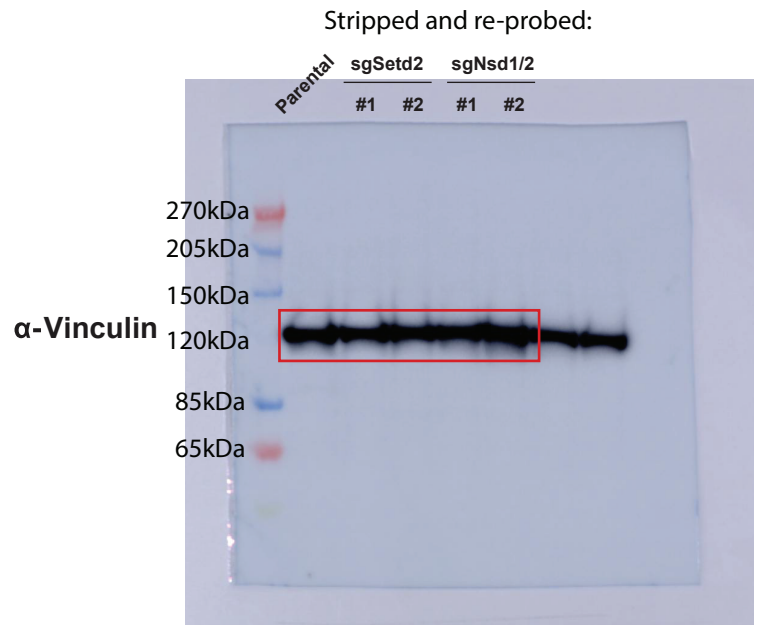

**Extended Data Fig. 4b**

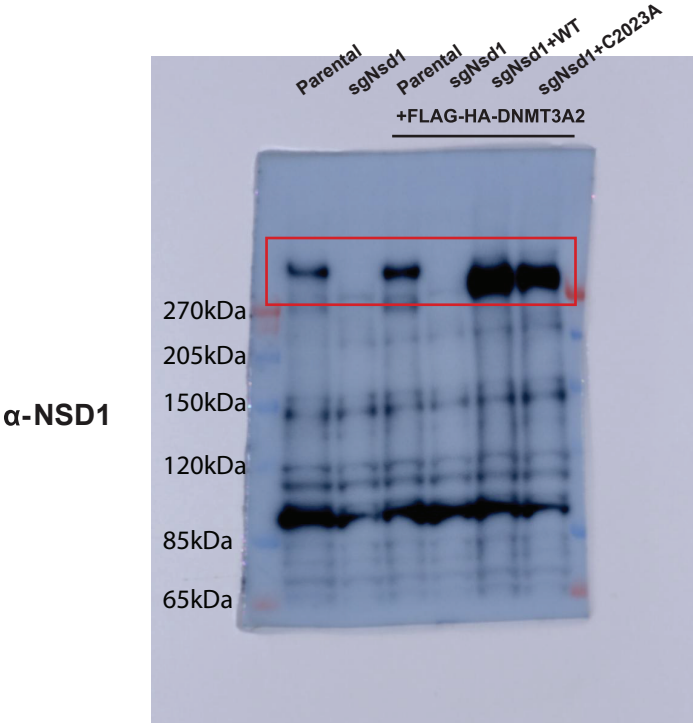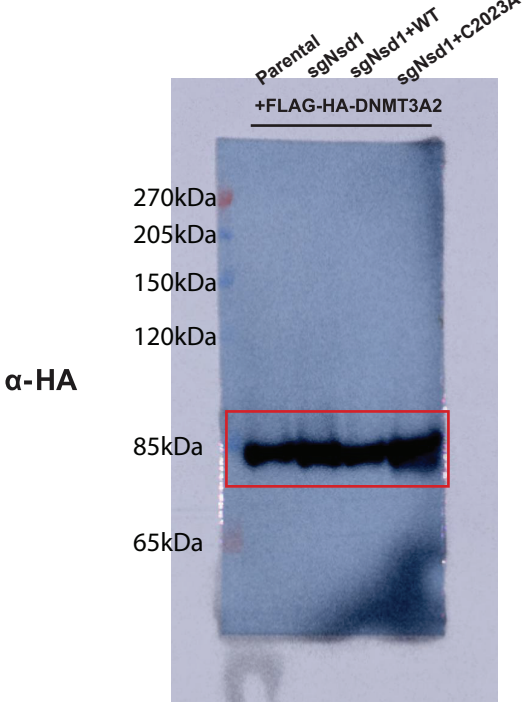

Stripped and re-probed:

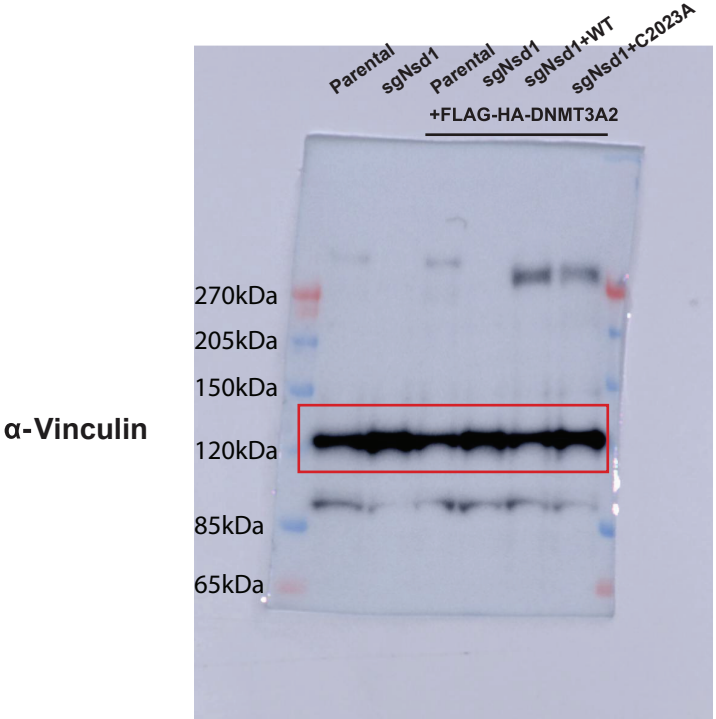

Stripped and re-probed:

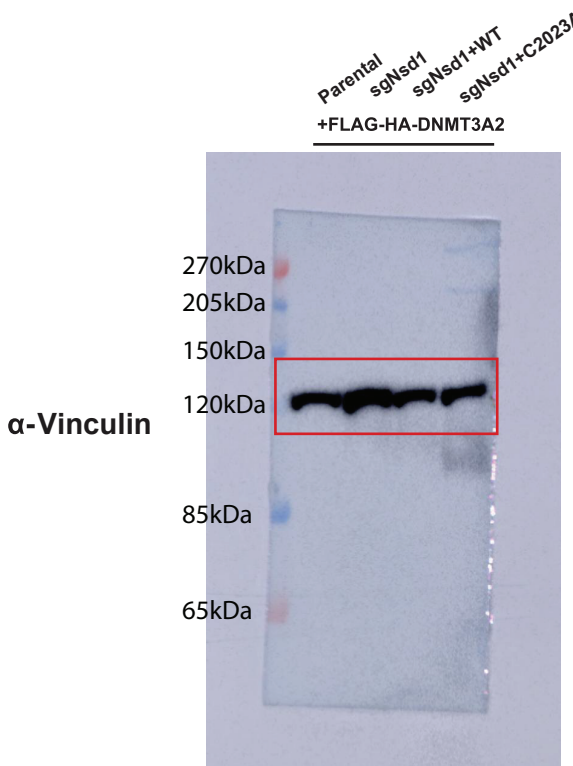

Extended Data Fig. 4c

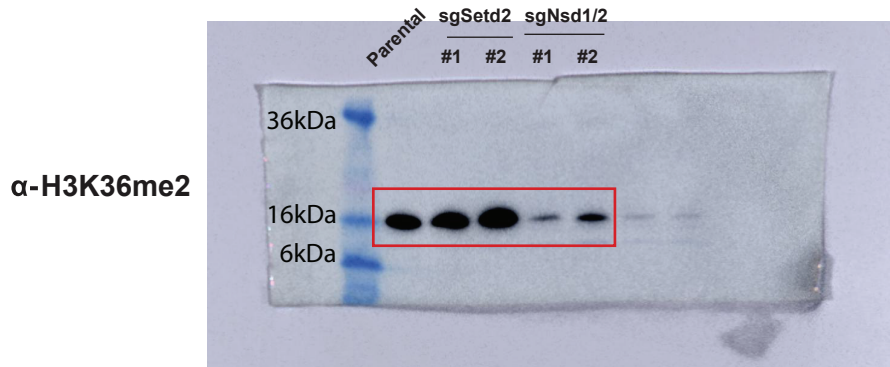

Stripped and re-probed:

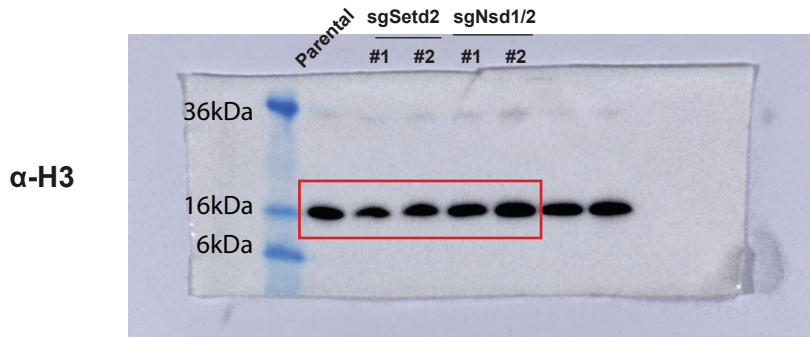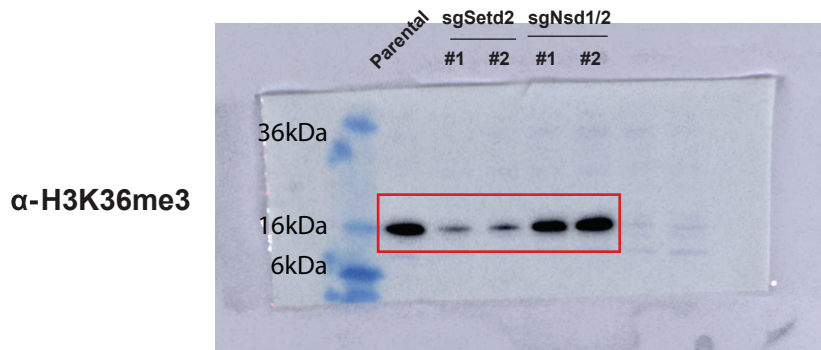

### Extended Data Fig. 5a

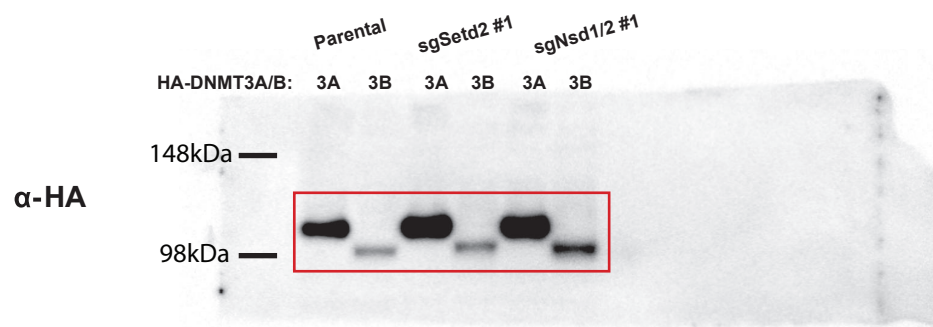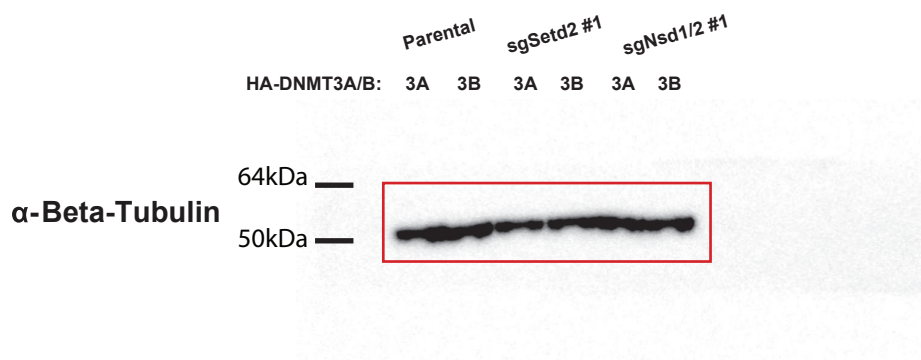

Extended Data Fig. 5b

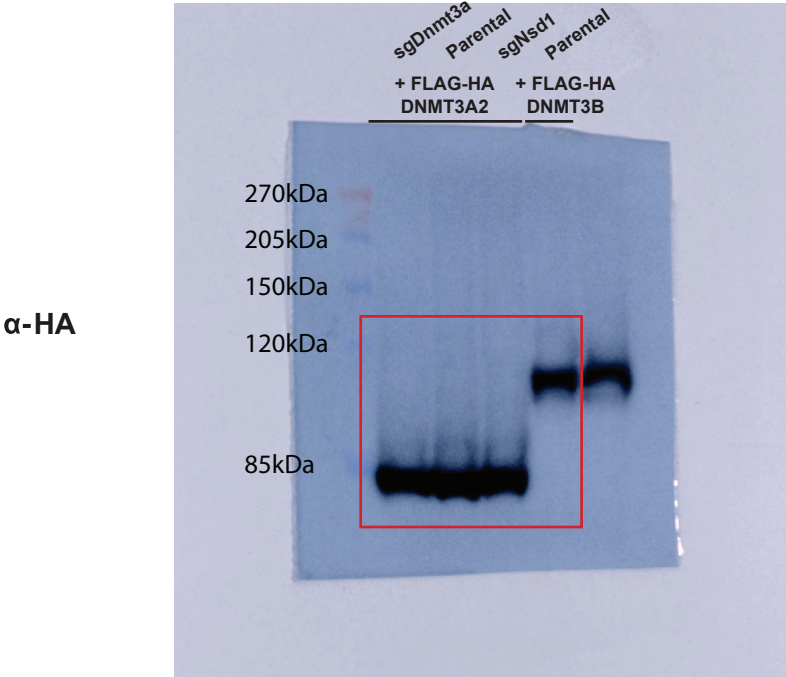

Stripped and re-probed:

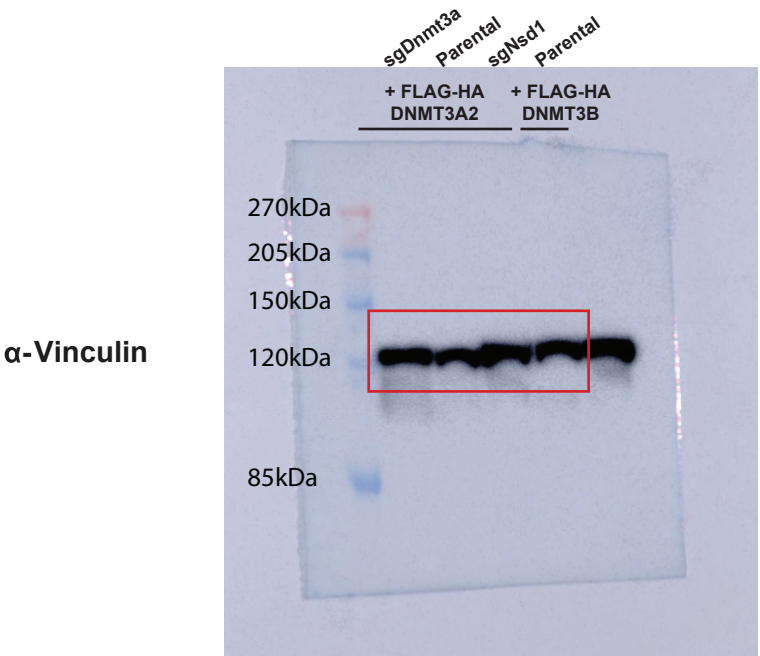



## Extended Data Fig. 7d

DNMT3A:     -     WT     D333A     WT  
                 Parental     Parental     sgNsd1/2     Parental     sgNsd1/2     TKO

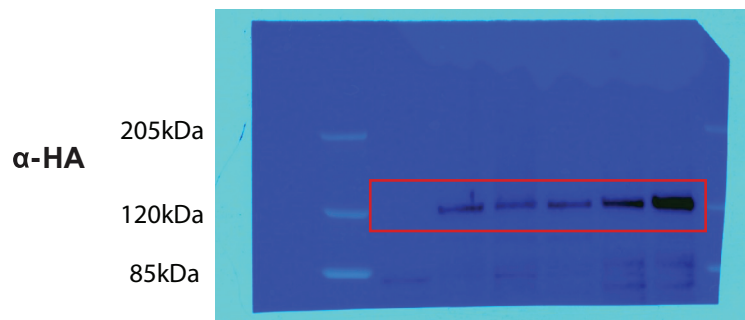

DNMT3A:     -     WT     D333A     WT  
                 Parental     Parental     sgNsd1/2     Parental     sgNsd1/2     TKO

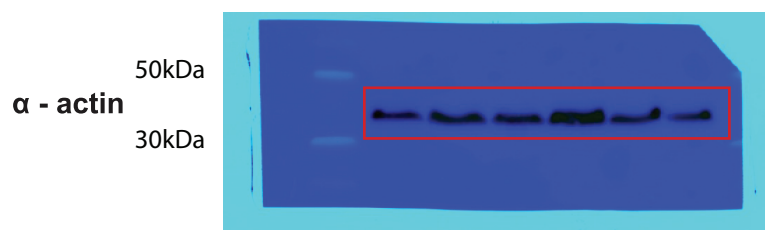

Extended Data Fig. 8a

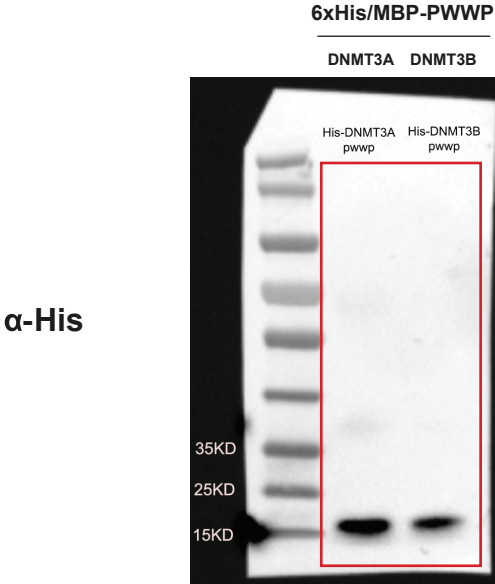

Extended Data Fig. 8b

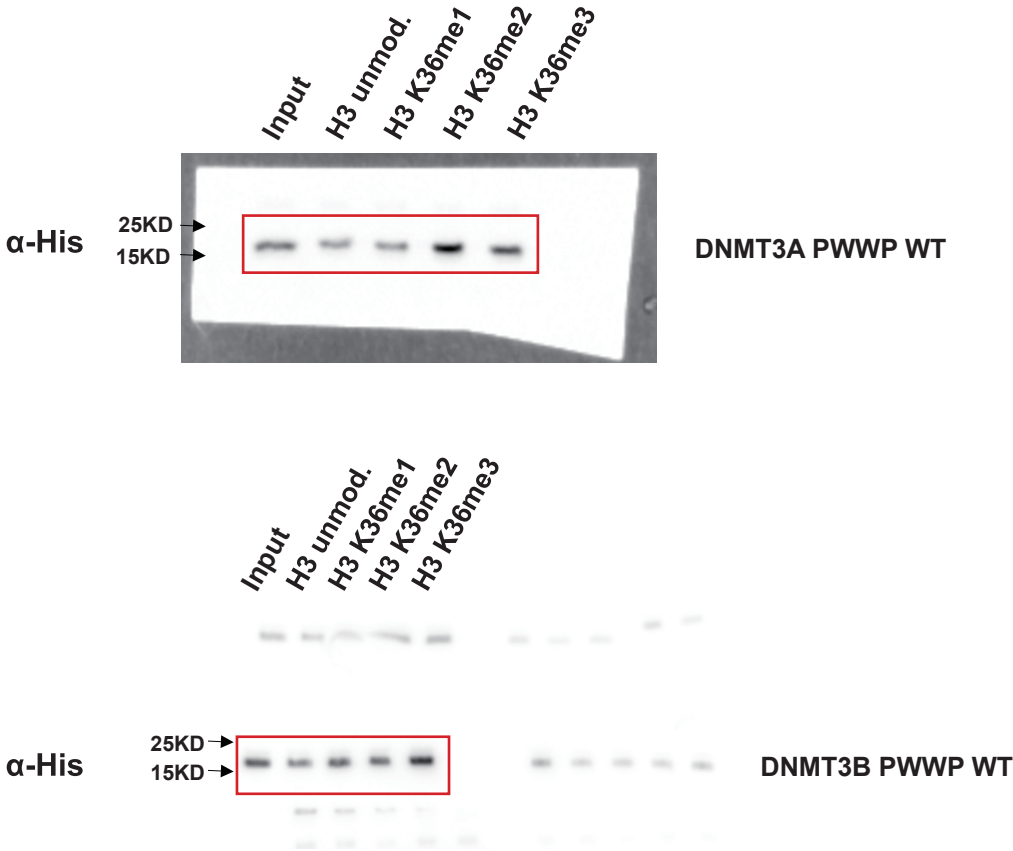

Extended Data Fig. 9a

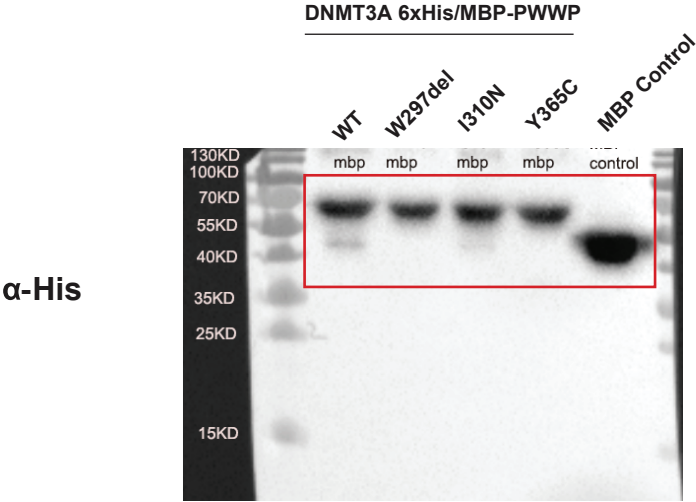

Extended Data Fig. 9b

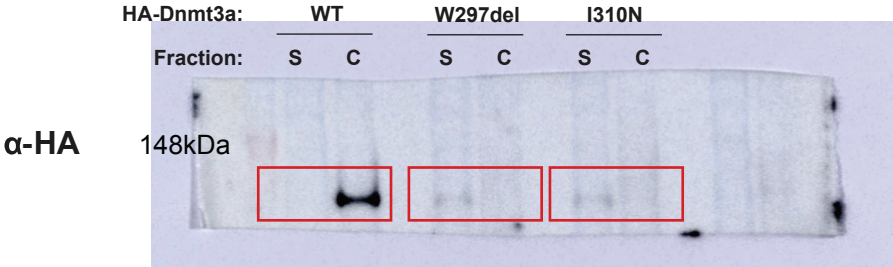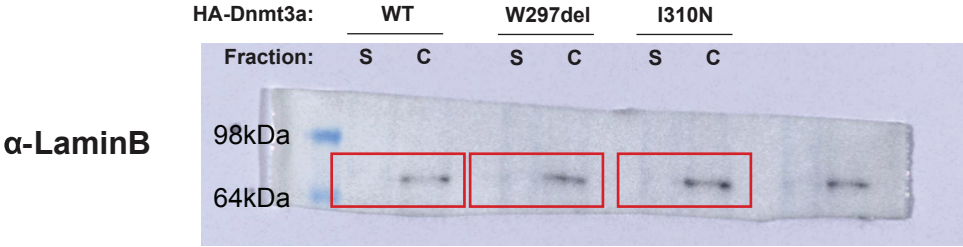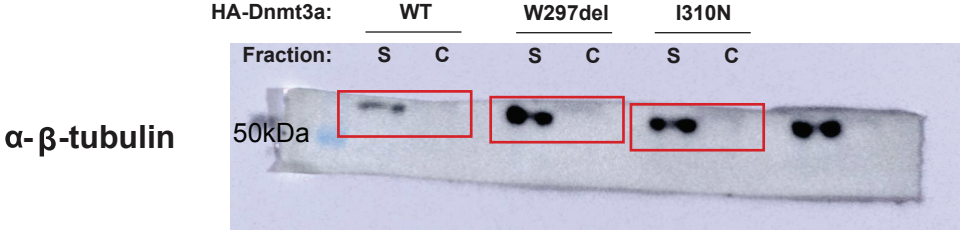

Extended Data Fig. 9c

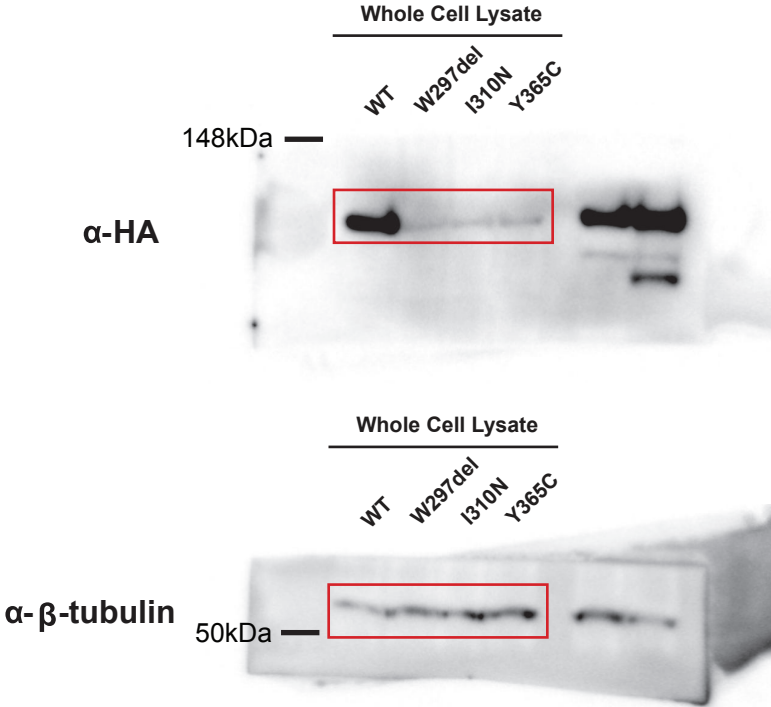

### Extended Data Fig. 9d

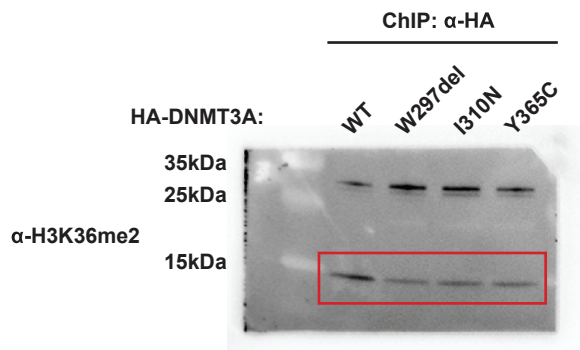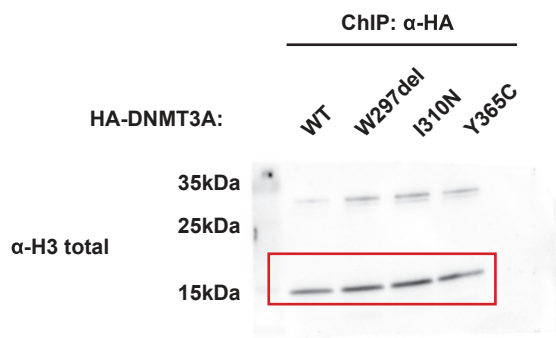

Supplement: NIHMS1536823-supplement-2.pdf [file NIHMS1536823-supplement-2.pdf]
